# Supplementary material for: Endogenous Anti-Inflammatory Very-Long-Chain Dicarboxylic Acids: Potential Chemopreventive Lipids
Source: PubMed Central journal article supplement (PMC6315409; doi:10.3390/metabo8040076), 2018-11-03
Supplement: metabolites-08-00076-s001.pdf [file metabolites-08-00076-s001.pdf]

Sample Name:  
E17063-41-02  
Data Collected on:  
Sai\_vnmrs400-vnmrs400  
Archive directory:  
/home/vnmr1/data/2017/Jul/20170710  
Sample directory:  
E17063-41-02\_20170710\_01  
FidFile: E17063-41-02\_PROTON\_01

Plotting Time: Mon Jul 10 10:49:20 IST 2017  
Pulse Sequence: PROTON (s2pul)  
Solvent: dmsd  
Data collected on: Jul 10 2017

Temp. 22.3 C / 295.4 K  
Operator: vnmr1

Relax. delay 2.000 sec  
Pulse 30.0 degrees  
Acq. time 2.045 sec  
Width 8012.8 Hz  
8 repetitions  
OBSERVE H1, 399.9662042 MHz  
DATA PROCESSING  
FT size 32768  
Total time 1 hr, 9 min

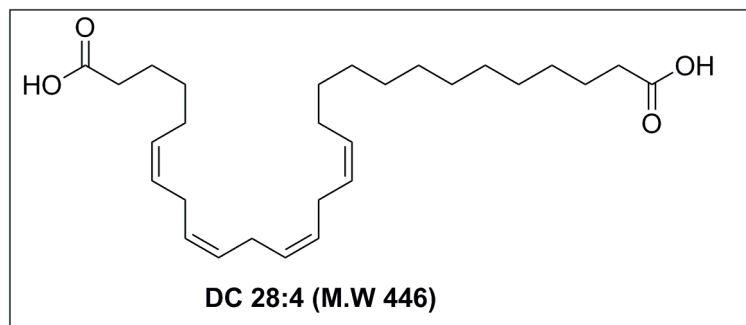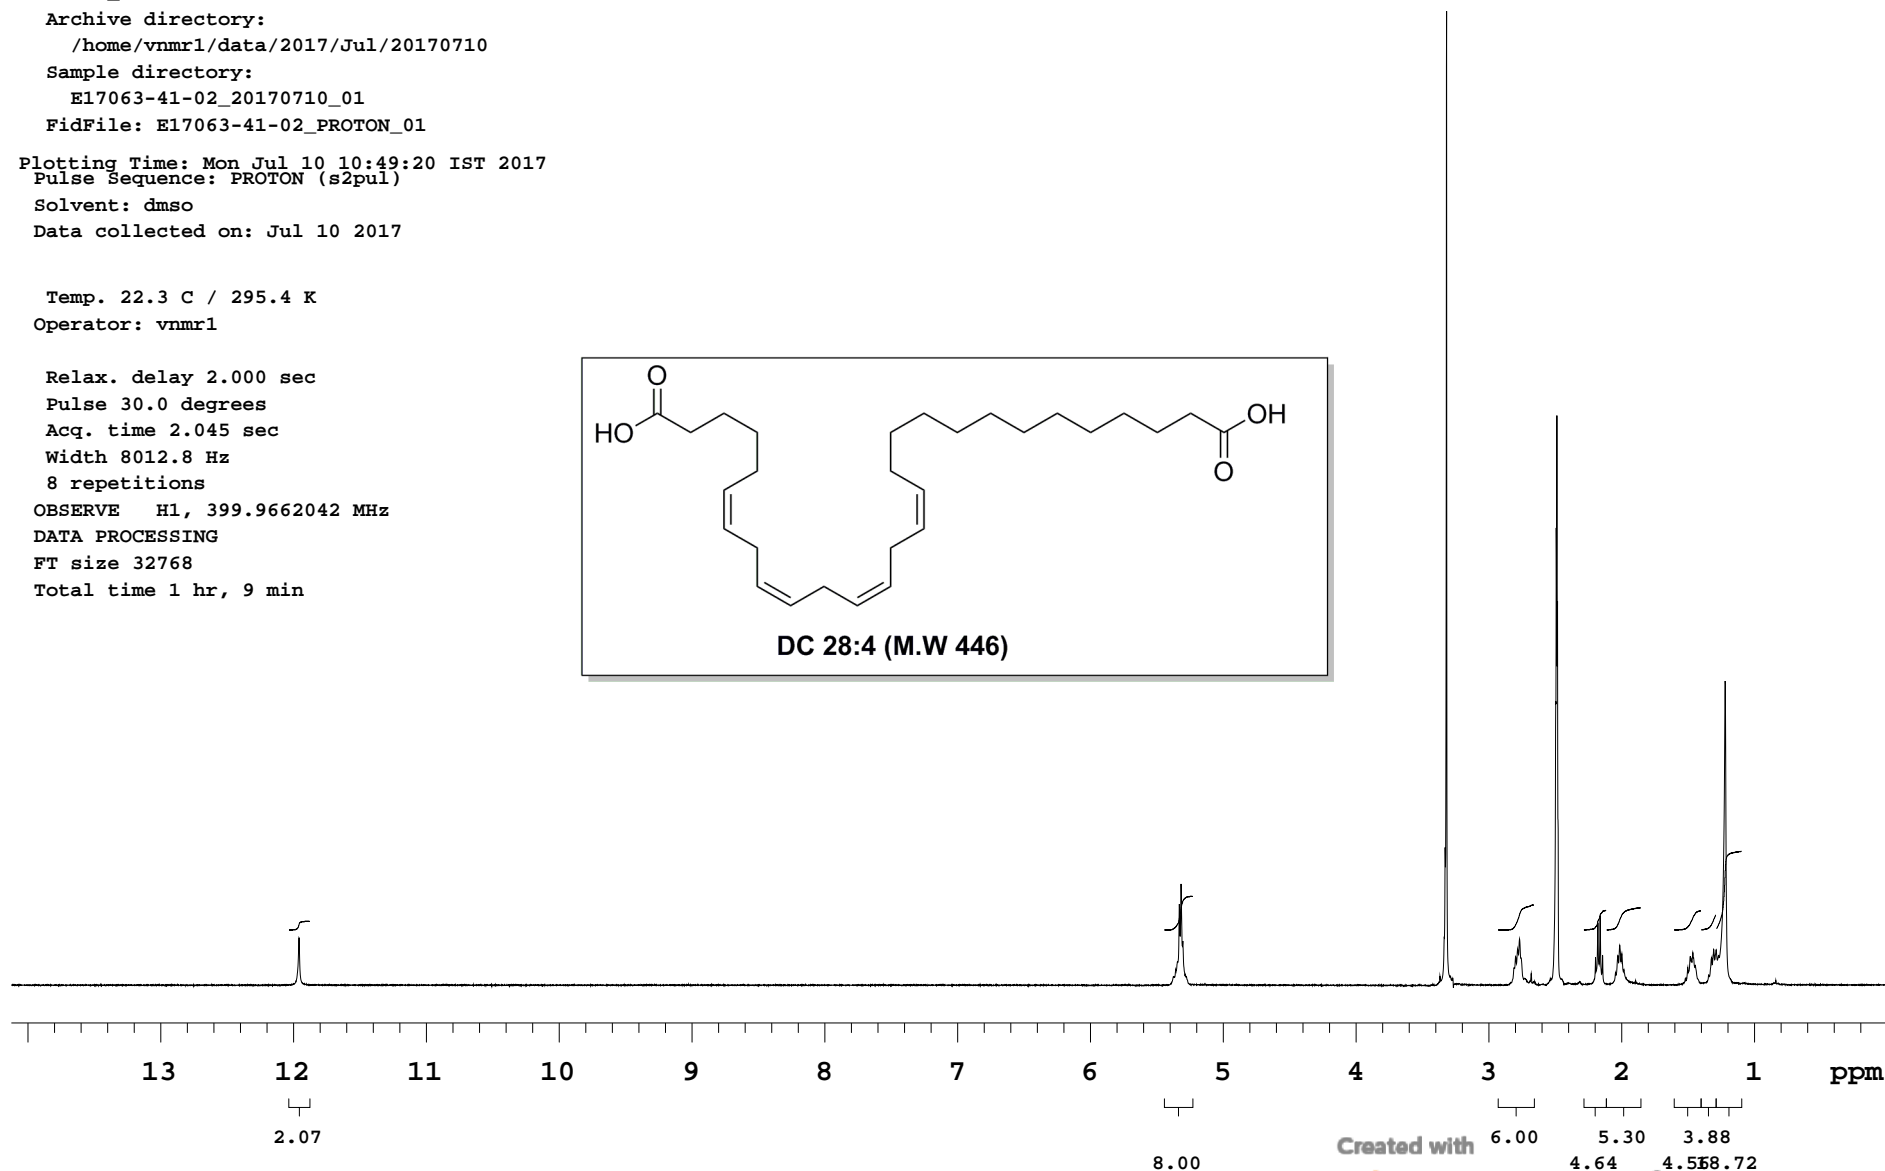

Plotname: E17063-41-02\_PROTON\_01\_plot01

Sample Name:  
E17063-41-02  
Data Collected on:  
Sai\_vnmrs400-vnmrs400  
Archive directory:  
/home/vnmr1/data/2017/Jul/20170710  
Sample directory:  
E17063-41-02\_20170710\_01  
FidFile: E17063-41-02\_PROTON\_01

Pulse Sequence: PROTON (s2pul)  
Solvent: dms0  
Data collected on: Jul 10 2017

Temp. 22.3 C / 295.4 K  
Operator: vnmr1

Relax. delay 2.000 sec  
Pulse 30.0 degrees  
Acq. time 2.045 sec  
Width 8012.8 Hz  
12 repetitions  
OBSERVE H1, 399.9662042 MHz  
DATA PROCESSING  
FT size 32768  
Total time 1 hr, 9 min

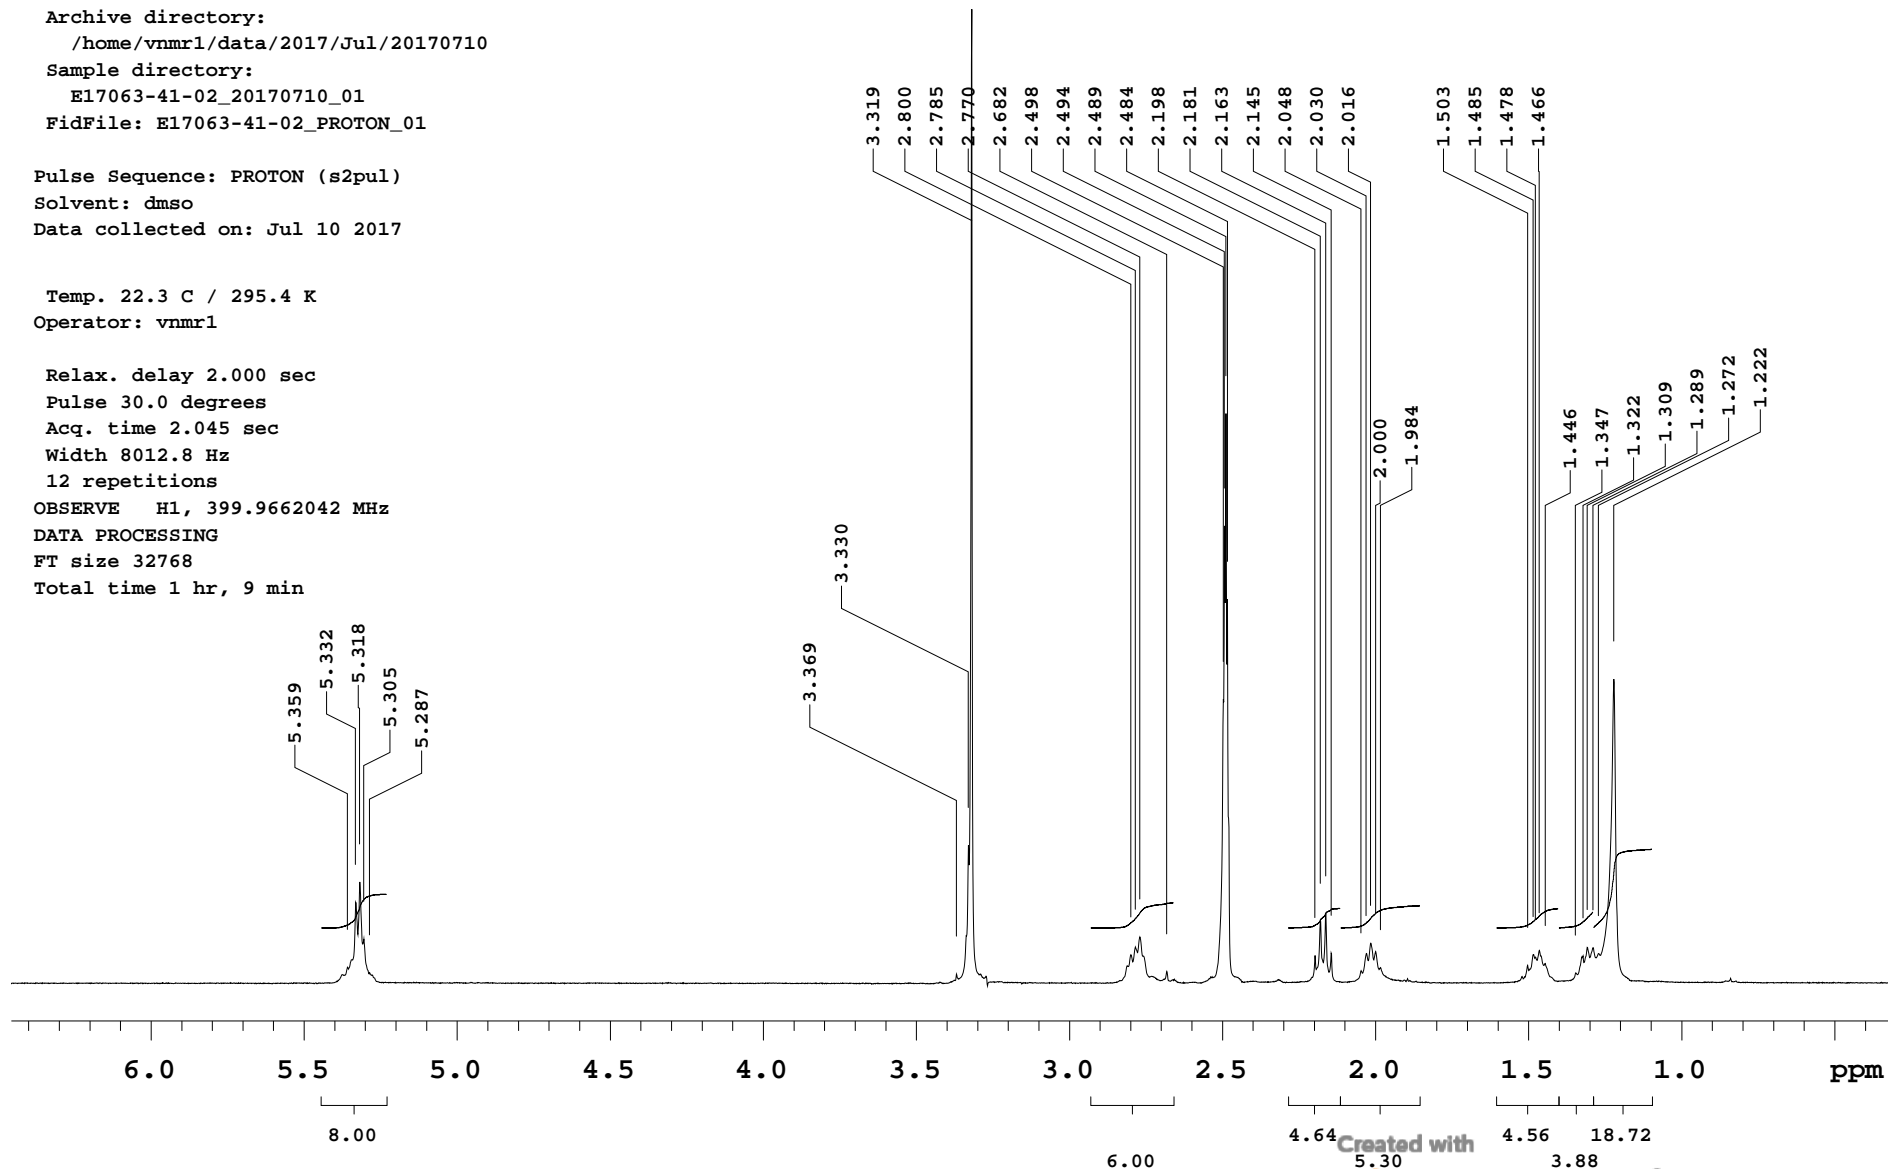

Plotname: E17063-41-02\_PROTON\_01\_plot03

Sample Name:  
E17063-41-02  
Data Collected on:  
Sai\_vnmrs400-vnmrs400  
Archive directory:  
/home/vnmr1/data/2017/Jul/20170710  
Sample directory:  
E17063-41-02\_20170710\_01  
FidFile: E17063-41-02\_PROTON\_01

Pulse Sequence: PROTON (s2pul)  
Solvent: dmsco  
Data collected on: Jul 10 2017

Temp. 22.3 C / 295.4 K  
Operator: vnmr1

Relax. delay 2.000 sec  
Pulse 30.0 degrees  
Acq. time 2.045 sec  
Width 8012.8 Hz  
12 repetitions  
OBSERVE H1, 399.9662042 MHz  
DATA PROCESSING  
FT size 32768  
Total time 1 hr, 9 min

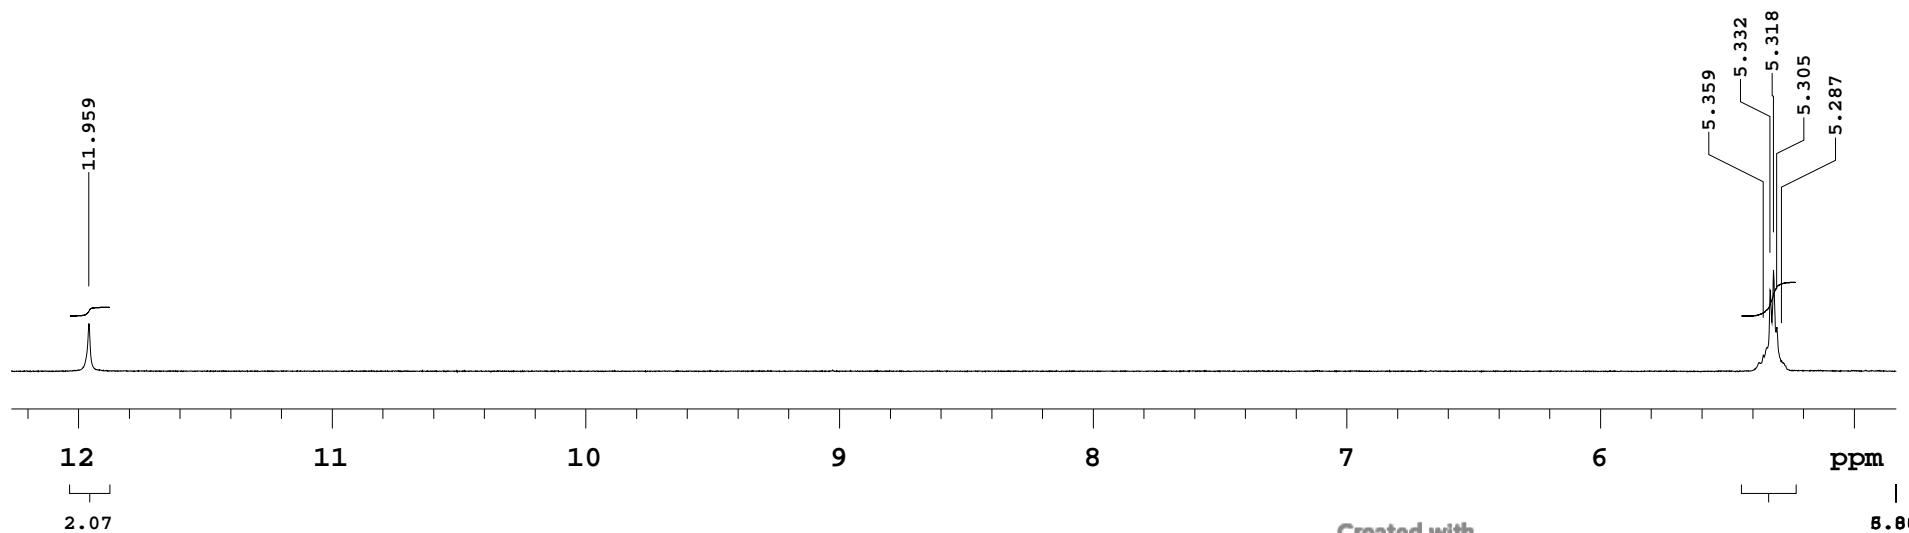

Plotname: E17063-41-02\_PROTON\_01\_plot02

Sample Name:

E17063-041-02\_NMR

Data Collected on:

Sai\_vnmrs400-vnmrs400

Archive directory:

/home/vnmr1/data/2017/Jul/20170707

Sample directory:

E17063-041-02\_NMR\_20170707\_01

FidFile: E17063-041-02\_NMR\_PROTON\_01

Plotting Time: Fri Jul 7 15:44:07 IST 2017

Pulse Sequence: PROTON (s2pul)

Solvent: cdcl3

Data collected on: Jul 7 2017

Temp. 25.0 C / 298.1 K

Operator: vnmr1

Relax. delay 2.000 sec

Pulse 30.0 degrees

Acq. time 2.000 sec

Width 8012.8 Hz

8 repetitions

OBSERVE H1, 399.9643004 MHz

DATA PROCESSING

FT size 32768

Total time 1 hr, 8 min

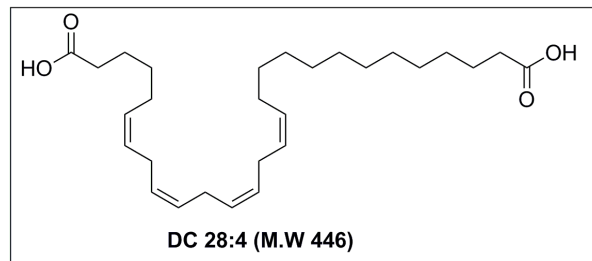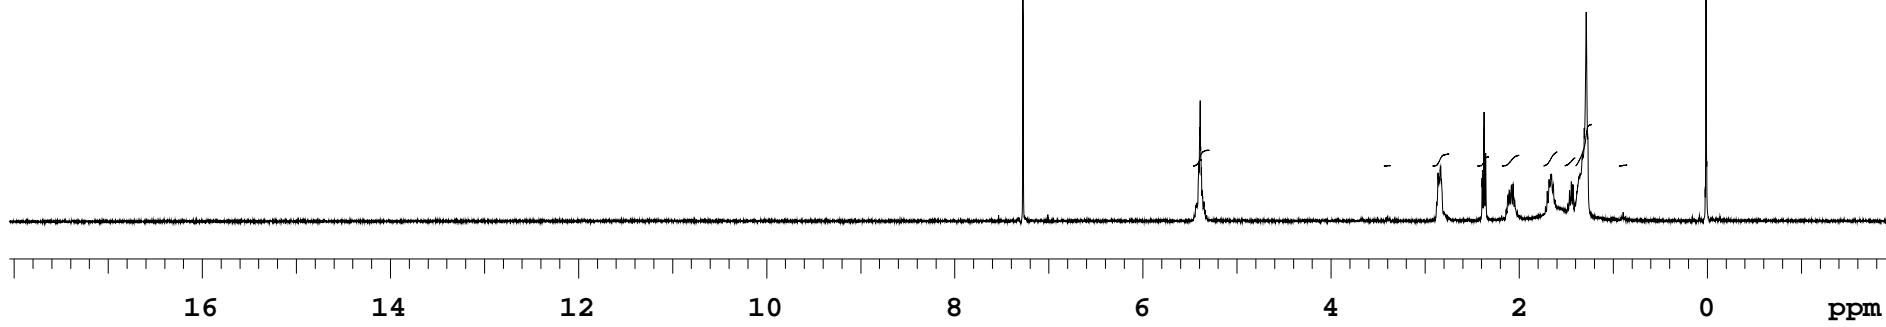

Plotname: E17063-041-02\_NMR\_PROTON\_01\_plot01
